# Supplementary material
Source: publisher figshare collection journal article supplement (https://sage.figshare.com/ndownloader/files/44205909)
Supplement: Supplementary file 1 [file 44205909]

## Sheet: Taul1
Supplemental Table 3. Frequencies of Physical Education Activity of a Coach
Physical Education Activity of a Coach	Almost never	Rarely	Every now and then	Quite often	Almost always
I instruct players to engage in PA adequately and diversely	4.0	8.0	28.0	48.0	12.0
I encourage players to walk or cycle	8.0	12.0	36.0	32.0	12.0
I set a good example for the players with my actions			20.8	66.7	12.5
In coaching, I strive to make the training sensible and fun				56.0	44.0
I interact with players during practice / competitions				24.0	76.0
In training I take into account the individual skill level of the players		4.0	4.0	56.0	36.0
In training I take into account the level of mental development of the players			16.0	56.0	28.0
I try to ensure that the weekly physical exertion of the players is in balance with rest			25.0	54.2	20.8
I try to ensure that the weekly physical exertion of the players is in balance with the exertion caused by school and other non-sports-related issues		8.3	25.0	54.2	12.5
I talk about health and physical activity with parents / families	8.3	33.3	37.5	16.7	4.2
I discuss with players the connection between overall PA and health, training, and growth as an athlete	12.5	12.5	41.7	29.2	4.2
I organize lectures and share information about overall PA	58.3	16.7	12.5	12.5

## Sheet: Taul2
4.0	8.0	28.0	48.0	12.0
8.0	12.0	36.0	32.0	12.0
		20.8	66.7	12.5
			56.0	44.0
			24.0	76.0
	4.0	4.0	56.0	36.0
		16.0	56.0	28.0
		25.0	54.2	20.8
	8.3	25.0	54.2	12.5
8.3	33.3	37.5	16.7	4.2
12.5	12.5	41.7	29.2	4.2
58.3	16.7	12.5	12.5
